# Supplementary material
Source: PubMed Central journal article supplement (PMC3830614)
Supplement: NIHMS478733-supplement-Supp_Material.pdf [file NIHMS478733-supplement-Supp_Material.pdf]

**Web-Based Supporting Materials for SIM-12-0064 Resubmission**  
**“Extending the Peters-Belson approach for assessing disparities  
to right censored time-to-event outcomes”**

**Computer code and output**

Here is R code, using the *survival* package, and output for Peters-Belson comparing incident Dual Incontinence (DI) in Hispanics for the case in which the analysis is not stratified by nursing home. The one-sample log rank test is computed using a call to the `glm` function, which fits a Poisson regression, as suggested in the documentation for the `survexp` function. In that Poisson regression, the log standardized mortality ratio is the intercept, and the test of whether that intercept is zero is identical to the one-sample log-rank test.

**Code for plots and analysis:**

```
### read in data set containing Whites who live      ###
### in NHs that also have Hispanics                ###
### remove NH ID and person ID columns             ###
whitesH1 <- read.csv("raceDI_5h.csv")
whitesH <- whitesH1[,c(-1,-2)]

### read in data set containing Hispanics who live  ###
### in those same NHs                             ###
### remove NH ID and person ID columns             ###
hisp1<- read.csv("raceDI_4.csv")
hisp<- hisp1[,c(-1,-2)]

### fit Cox model to Whites using all covariates in ###
### the input data set                             ###
coxWhites <- coxph(Surv(DI_DAYS, HAS_DI)~ . , data = whitesH,
                  na.action = na.omit)
summary(coxWhites)

### compute Kaplan-Meier of DI for the Hispanics    ###
kmHispanics <- survfit(Surv(DI_DAYS, HAS_DI)~1, data = hisp)

### compute expected DI for the Hispanics           ###
fitHispanics <- survexp(DI_DAYS~1, data = hisp,
                      ratetable = coxWhites, conditional = F,
                      times=kmHispanics$time)

### plot Kaplan-Meier of DI vs. follow-up time      ###
### superimpose expected DI vs. follow-up time     ###
pdf("hispanics.pdf")
plot(kmHispanics, mark.time = F, xlab="Follow-up time (days)",
     ylab="Proportion without Dual Incontinence (DI)")
legend(600,0.95,lty=c(1,1),col=c(1,2),
      c("Observed with 95% CL","Predicted"))
lines(fitHispanics, col = 2)
graphics.off()

### compute one-sample likelihood ratio test        ###
```

```

### bound predicted hazards away from 0 by adding ###
### a small constant (0.0002) to all ###
hazH <- -log(survexp(DI_DAYS~1, data = hisp,
                    ratetable = coxWhites, conditional = F, cohort= F))
hazHispanics <- hazH + .00002
lrtHispanics <- glm(HAS_DI ~1 + offset(log(hazHispanics)),
                  family = poisson, data = hisp)
summary(lrtHispanics)

```

### Output for Cox model fit using data for Whites:

Call:

```
coxph(formula = Surv(DI_DAYS, HAS_DI) ~ ., data = white, na.action = na.omit)
```

n= 16230, number of events= 1782

|          | coef      | exp(coef) | se(coef) | z      | Pr(> z ) |     |
|----------|-----------|-----------|----------|--------|----------|-----|
| AGE      | 0.016876  | 1.017020  | 0.003306 | 5.105  | 3.31e-07 | *** |
| GENDER   | -0.199871 | 0.818837  | 0.054248 | -3.684 | 0.000229 | *** |
| ADL_7    | 0.048695  | 1.049901  | 0.003843 | 12.671 | < 2e-16  | *** |
| COMM_2   | 0.088954  | 1.093030  | 0.015736 | 5.653  | 1.58e-08 | *** |
| RESTRAIN | 0.314821  | 1.370014  | 0.077992 | 4.037  | 5.42e-05 | *** |
| CHARLSON | 0.040339  | 1.041163  | 0.016535 | 2.440  | 0.014705 | *   |
| MED_WKS  | 0.043807  | 1.044781  | 0.019723 | 2.221  | 0.026339 | *   |
| BOWEL    | -0.103370 | 0.901793  | 0.062786 | -1.646 | 0.099682 | .   |

---

Signif. codes: 0 '\*\*\*' 0.001 '\*\*' 0.01 '\*' 0.05 '.' 0.1 ' ' 1

|          | exp(coef) | exp(-coef) | lower .95 | upper .95 |
|----------|-----------|------------|-----------|-----------|
| AGE      | 1.0170    | 0.9833     | 1.0105    | 1.0236    |
| GENDER   | 0.8188    | 1.2212     | 0.7362    | 0.9107    |
| ADL_7    | 1.0499    | 0.9525     | 1.0420    | 1.0578    |
| COMM_2   | 1.0930    | 0.9149     | 1.0598    | 1.1273    |
| RESTRAIN | 1.3700    | 0.7299     | 1.1758    | 1.5963    |
| CHARLSON | 1.0412    | 0.9605     | 1.0080    | 1.0755    |
| MED_WKS  | 1.0448    | 0.9571     | 1.0052    | 1.0860    |
| BOWEL    | 0.9018    | 1.1089     | 0.7974    | 1.0199    |

Concordance= 0.644 (se = 0.008 )

Rsquare= 0.017 (max possible= 0.817 )

Likelihood ratio test= 281.3 on 8 df, p=0

Wald test = 292.4 on 8 df, p=0

Score (logrank) test = 301.3 on 8 df, p=0

### One-sample Likelihood Ratio Test Output:

Call:

```
glm(formula = HAS_DI ~ 1 + offset(log(hazH2)), family = poisson,
    data = hisp)
```

Deviance Residuals:

| Min     | 1Q      | Median  | 3Q      | Max    |
|---------|---------|---------|---------|--------|
| -1.9331 | -0.2912 | -0.0682 | -0.0140 | 3.3616 |

Coefficients:

|             | Estimate | Std. Error | z value | Pr(> z ) |
|-------------|----------|------------|---------|----------|
| (Intercept) | -0.07886 | 0.11180    | -0.705  | 0.481    |

(Dispersion parameter for poisson family taken to be 1)

Null deviance: 292.57 on 608 degrees of freedom  
Residual deviance: 292.57 on 608 degrees of freedom  
AIC: 454.57

Number of Fisher Scoring iterations: 7
